## **Modelling donor screening strategies to reduce the risk of SARS-CoV-2 via fecal microbiota transplantation**

Scott W. Olesen PhD, Amanda Zaman MSN, Majdi Osman MBBS MPH, Bharat Ramakrishna MBBS\*

OpenBiome, 2067 Massachusetts Avenue, Cambridge, MA 02140

\* Correspondence: [bramakrishna@openbiome.org](mailto:bramakrishna@openbiome.org)

Word count: 1639

## 1 **ABSTRACT**

2 The potential for transmission of SARS-CoV-2 shed in stool via fecal microbiota transplantation  
3 is not yet known, and the effectiveness of various testing strategies to prevent FMT-based  
4 transmission has also not yet been quantified. Here we use a mathematical model to simulate  
5 the utility of different testing strategies.

## 7 **INTRODUCTION**

8 Fecal microbiota transplantation (FMT), the instillation of stool from a healthy donor into a  
9 patient's gut, is a recommended therapy for the most common hospital-acquired infection in the  
10 United States, *Clostridioides difficile*, and is being explored as an experimental therapy for  
11 dozens of other conditions.<sup>1,2</sup> As with all human-derived therapies, the safety of FMT depends  
12 on screening donors to prevent transmission of pathogens via the procedure,<sup>3</sup> and screening  
13 guidelines must be continually updated to account for emerging pathogens.

14  
15 SARS-CoV-2, the virus that causes COVID-19, is primarily considered a respiratory pathogen,  
16 but evidence suggests that the virus is able to independently replicate in the gut, raising the  
17 possibility of transmission via the fecal oral-route or via FMT.<sup>4</sup> Practitioners<sup>4,11</sup> and regulators<sup>12</sup>  
18 have therefore called for screening of FMT donors for SARS-CoV-2. However, because of the  
19 virus's long incubation period, the high proportion of infected individuals that are asymptomatic,<sup>6</sup>  
20 and the long period in which apparently-recovered individuals can continue to shed virus in their  
21 stool,<sup>7-10</sup> screening FMT donors using COVID-19 clinical assessment alone is insufficient.

22  
23 Despite the consensus that FMT donors should be screened for SARS-CoV-2, the optimal  
24 available strategy for detecting asymptomatic carriage among FMT donors is unclear. The  
25 theoretical effectiveness of polymerase chain reaction (PCR) tests using nasopharyngeal  
26 swabs, stool-based PCR tests, donor serology tests, or a combination of those tests has not

27 been assessed or compared. We therefore developed a mathematical model of SARS-CoV-2  
28 infection among FMT donors that simulates the effect of different testing strategies. The model  
29 quantifies the effect of more stringent testing on the desirable reduction in potentially infectious,  
30 virus-positive donations processed into FMT material and released for use as well as the  
31 undesirable reduction in virus-negative donations released.

32

### 33 **METHODS**

34 We built an abstract model of FMT donors, simulating their donation schedule, SARS-CoV-2  
35 infection incidence, and COVID-19 disease course. On top of these simulations, we layered  
36 various screening strategies, accounting for the imperfect specificity and sensitivity of each test,  
37 to estimate how many virus-negative donations would be appropriately released for use and  
38 how many virus-positive donations would be undesirably released. Parameters for the model  
39 are shown in Table 1.

40

41 Each simulation treats a single donor and runs in discrete time steps of 1 day. The simulation  
42 begins when the donor enrolls as a stool donor and ends either when the donor is removed  
43 because of a positive virus test or after a fixed time. Donors donate stool at set intervals.

44

45 We simulate the course of SARS-CoV-2 infection according to the general picture of  
46 Sethuraman *et al.*<sup>13</sup> For simplicity, and to reflect the rigor of the initial screening for new donors,  
47 donors are assumed to have tested negative on all screens be unexposed  $U$  when they enroll  
48 on the first day of the simulation. Each day, the donor has a probability of becoming infected  $I_1$ ;  
49 this is the incidence of infection. We ignore any latent period, as it is not relevant to the model. A  
50 proportion of infected donors develop symptoms. If a donor becomes symptomatic, their  
51 donations from the 14 days prior to onset of symptoms are rejected, and the donor is removed.  
52 We assume that an asymptomatic donor in phase  $I_1$  has detectable virus in their nasopharynx

53 but is not shedding detectable loads virus in stool and has not developed detectable IgG  
54 antibodies (Supplemental Table 1). After a period of time, the donor enters a second phase of  
55 infection  $I_2$ . A proportion of  $I_2$  donors are “stool shedders”. Shedders have detectable virus in  
56 their stool, and donations produced by shedders are virus-positive. After this second phase of  
57 infection, donors enter a first recovery phase  $R_1$ . In this phase, donors no longer have  
58 detectable nasopharyngeal virus, but they do have detectable antibodies. Shedders continue to  
59 produce virus in stool. Finally, donors enter a second recovery phase  $R_2$ . Donors in this phase  
60 do not have detectable virus in their stool, but they remain detectable by serology. We did not  
61 consider the role of immunity because the chance of multiple asymptomatic, undetected  
62 infections during the simulation period is low.

63

64 Simulated donors are screened for the virus according to a screening strategy that consists of a  
65 set of individual test types: a nasopharyngeal swab test performed at 14-day intervals; a blood  
66 IgG antibody test at 60-day intervals; and a stool test performed at 14-day intervals, at 28-day  
67 intervals, or at every donation. If a donor tests positive on any test implemented in a strategy,  
68 they are removed and do not continue to donate. Donations are released only if they are  
69 “bookended” by two negative screens. In other words, any donations made after the last  
70 negative test conducted before the first positive test are destroyed.

71

72 The model has two outcomes: the number of “true negative”, virus-negative donations released  
73 and the number of “false negative”, virus-positive donations released. A desirable screening  
74 strategy will release many virus-negative donations and few or no virus-positive donations, while  
75 a poor strategy will needlessly destroy many virus-negative donations or release many virus-  
76 positive donations.

77

78 To evaluate the effectiveness of different testing strategies, 10,000 simulations were run for  
79 each of 3 incidences (1 infection per 1,000 people per day; 1 per 10,000; 1 per 100,000) and  
80 each of 9 screening strategies (stool testing only at 28-day intervals or 14-day intervals, or  
81 testing every stool; nasopharyngeal swabs only; nasopharyngeal swabs and stool at each of the  
82 3 stool-testing intervals; nasopharyngeal swabs and serology; nasopharyngeal swabs, serology,  
83 and every stool). A sensitivity analysis was run to evaluate the dependence of the model  
84 outcomes on input parameters. In 10,000 simulations, parameters were varied over the  
85 hypercube bounded by the upper and lower parameter estimates in Table 1. Sensitivity was  
86 assessed by the Spearman's  $\rho$  correlation between each input parameter and each of the 2  
87 outcomes. Statistical significance was assessed using the false discovery rate, treating the  
88 simulations in each strategy separately.

89

90 Simulations and analyses were run using R (version 3.6.0).<sup>14</sup> Code to reproduce the results is  
91 available online (DOI: 10.5281/zenodo.3903840).

92

## 93 **RESULTS**

94 The number of virus-positive and -negative donations released varied over simulations and  
95 depended on testing strategy and incidence of infection (Figure 1, Supplemental Table 2). In  
96 general, the more sensitive strategies released fewer virus-positive donations but also removed  
97 donors early due to false positives and therefore released fewer virus-negative donations per  
98 donor. In other words, the most sensitive strategies were also the least specific.

99

100 At the baseline incidence of 1 infection per 10,000 people per day, the least stringent strategy  
101 (testing stool at 28-day intervals) released approximately 1 virus positive-donation per 3,000  
102 donations, while the most stringent strategy (nasopharyngeal swabs, serology tests, and testing  
103 every stool) released approximately 1 per 400,000 (Supplemental Table 2). In other words, the

104 most stringent strategy released 100-fold less virus-positive material than the least stringent  
105 strategy.

106

107 Even at the lower incidence of 1 infection per 100,000 people per day, the least stringent  
108 strategy (testing stool at 28-day intervals) released approximately 1 virus-positive donation per  
109 30,000 donations. By contrast, the most stringent strategy (nasopharyngeal swabs, serology  
110 tests, and testing every stool) released 1 virus-positive donation per 40,000 donations only at  
111 the higher incidence of 1 infection per 1,000 people per day. In other words, the difference in  
112 risk of released virus-positive material between the most and least stringent strategies was  
113 comparable to the effect of a 100-fold change in daily SARS-CoV-2 incidence.

114

115 In a sensitivity analysis (Supplemental Figure 1), the parameters most strongly associated with  
116 the two outcomes (Spearman's  $\rho > 10\%$ , false discovery rate  $< 0.05$ ) were donation interval  
117 (longer interval correlated with fewer virus-negative donations released), the specificities of the  
118 3 tests (more specific tests correlated with more virus-negative donations released), and SARS-  
119 CoV-2 incidence (higher incidence correlated with more virus-positive donations released).

120

## 121 **DISCUSSION**

122 A mathematical model of SARS-CoV-2 infection among stool donors suggests that, if incidence  
123 among stool donors is comparable to the aggregate national average, if a stringent strategy is  
124 used, and if our estimates of the sensitivity and specificity of the tests are accurate, then the  
125 probability of releasing a virus-positive donation for clinical use is low. The most stringent test  
126 strategies involved testing every stool, while the least sensitive strategies were to use  
127 nasopharyngeal swab alone or to test stool at 28-day intervals. More stringent tests were more  
128 sensitive but also less specific, and the most appropriate strategy must be determined by a  
129 balance between the necessary stringency and logistical considerations like resourcing.

130

131 The strength of this analysis is its quantitative treatment of a pressing clinical question.

132 However, it has multiple limitations. First, as a modeling study, the accuracy of the results

133 depend on the accuracy of the input parameters and the appropriateness of the model structure,

134 especially the tests' sensitivity and specificity as well as the incidence of SARS-CoV-2 infection,

135 values which remain subject to refinement. Thus, the quantitative predictions made by the

136 model should be used as guides to clinical reasoning rather than as precision forecasts.

137 Second, the model makes a number of assumptions about the course of disease that may be

138 shown to be invalid or that are no longer applicable. For example, our assumption that newly

139 enrolled donors are seronegative maximizes the sensitivity of serology testing. As the number of

140 candidate donors with positive serology rises, the sensitivity and utility of the serology test will

141 decline. Finally, verifying the model would be challenging, as the possibility of fecal-oral

142 transmission of SARS-CoV-2 has not been confirmed, and there is no accepted "gold standard"

143 for detecting SARS-CoV-2 in stool.

144

145 Although these results are encouraging, we again caution that they depend on a number of

146 assumptions about testing quality and SARS-CoV-2 epidemiology that will be refined in the

147 coming months. Nevertheless, this method is valuable in assessing the risks of transmission in

148 this evolving pandemic, and we hope this approach can serve as a model for evaluating testing

149 strategies for other pathogens or human-derived therapies beyond FMT.

150

## 151 **Acknowledgements**

152 Emily Langner for helpful comments.

153

154

## 155 **REFERENCES**

- 156 1. Allegretti, J. R., Mullish, B. H., Kelly, C. & Fischer, M. The evolution of the use of faecal  
157 microbiota transplantation and emerging therapeutic indications. *Lancet (London,*  
158 *England)* **394**, 420–431 (2019).
- 159 2. Olesen, S. W., Panchal, P., Chen, J., Budree, S. & Osman, M. Global disparities in faecal  
160 microbiota transplantation research. *Lancet Gastroenterol. Hepatol.* **5**, 241 (2020).
- 161 3. Cammarota, G. *et al.* International consensus conference on stool banking for faecal  
162 microbiota transplantation in clinical practice. *Gut* **68**, 2111–2121 (2019).
- 163 4. Ianiro, G. *et al.* Screening of faecal microbiota transplant donors during the COVID-19  
164 outbreak: suggestions for urgent updates from an international expert panel. *The Lancet*  
165 *Gastroenterology and Hepatology* (2020) doi:10.1016/S2468-1253(20)30082-0.
- 166 5. Ianiro, G. *et al.* Screening of faecal microbiota transplant donors during the COVID-19  
167 outbreak: suggestions for urgent updates from an international expert panel. *Lancet*  
168 *Gastroenterol. Hepatol.* **5**, 430–432 (2020).
- 169 6. US Centers for Disease Control and Prevention. COVID-19 Pandemic Planning  
170 Scenarios. (2020).
- 171 7. Chen, Y. *et al.* The presence of SARS-CoV-2 RNA in the feces of COVID-19 patients. *J.*  
172 *Med. Virol.* **92**, 833–840 (2020).
- 173 8. Wu, Y. *et al.* Prolonged presence of SARS-CoV-2 viral RNA in faecal samples. *Lancet*  
174 *Gastroenterol. Hepatol.* **5**, 434–435 (2020).
- 175 9. Xu, Y. *et al.* Characteristics of pediatric SARS-CoV-2 infection and potential evidence for  
176 persistent fecal viral shedding. *Nat. Med.* **26**, 502–505 (2020).
- 177 10. Kipkorir, V., Cheruiyot, I., Ngure, B., Misiani, M. & Munguti, J. Prolonged SARS-Cov-2



- 178 RNA Detection in Anal/Rectal Swabs and Stool Specimens in COVID-19 Patients After  
179 Negative Conversion in Nasopharyngeal RT-PCR Test. *J. Med. Virol.* jmv.26007 (2020)  
180 doi:10.1002/jmv.26007.
- 181 11. Green, C. A. *et al.* Screening faecal microbiota transplant donors for SARS-CoV-2 by  
182 molecular testing of stool is the safest way forward. *Lancet Gastroenterol. Hepatol.* **5**, 531  
183 (2020).
- 184 12. US Food and Drug Administration. Safety Alert Regarding Use of Fecal Microbiota for  
185 Transplantation and Additional Safety Protections Pertaining to SARS-CoV-2 and  
186 COVID-19. [https://www.fda.gov/vaccines-blood-biologics/safety-availability-](https://www.fda.gov/vaccines-blood-biologics/safety-availability-biologics/safety-alert-regarding-use-fecal-microbiota-transplantation-and-additional-safety-protections)  
187 [biologics/safety-alert-regarding-use-fecal-microbiota-transplantation-and-additional-](https://www.fda.gov/vaccines-blood-biologics/safety-availability-biologics/safety-alert-regarding-use-fecal-microbiota-transplantation-and-additional-safety-protections)  
188 [safety-protections](https://www.fda.gov/vaccines-blood-biologics/safety-availability-biologics/safety-alert-regarding-use-fecal-microbiota-transplantation-and-additional-safety-protections) (2020).
- 189 13. Sethuraman, N., Jeremiah, S. S. & Ryo, A. Interpreting Diagnostic Tests for SARS-CoV-  
190 2. *JAMA* **323**, 2249 (2020).
- 191 14. R Core Team. *R: A language and environment for statistical computing.* (R Foundation  
192 for Statistical Computing, 2019).
- 193 15. Lo, I. L. *et al.* Evaluation of SARS-CoV-2 RNA shedding in clinical specimens and clinical  
194 characteristics of 10 patients with COVID-19 in Macau. *Int. J. Biol. Sci.* **16**, 1698–1707  
195 (2020).
- 196 16. Zheng, S. *et al.* Viral load dynamics and disease severity in patients infected with SARS-  
197 CoV-2 in Zhejiang province, China, January-March 2020: retrospective cohort study. *BMJ*  
198 m1443 (2020) doi:10.1136/bmj.m1443.
- 199 17. Santos, V. S., Gurgel, R. Q., Cuevas, L. E. & Martins-Filho, P. R. Prolonged fecal  
200 shedding of SARS-CoV-2 in pediatric patients. A quantitative evidence synthesis. *J.*

- 201            *Pediatr. Gastroenterol. Nutr.* **Publish Ah**, (2020).
- 202    18.    Ma, X. *et al.* Do children need a longer time to shed SARS-CoV-2 in stool than adults? *J.*  
203            *Microbiol. Immunol. Infect.* **53**, 373–376 (2020).
- 204    19.    Zhao, J. *et al.* Antibody responses to SARS-CoV-2 in patients of novel coronavirus  
205            disease 2019. *Clin. Infect. Dis.* (2020) doi:10.1093/cid/ciaa344.
- 206    20.    Woloshin, S., Patel, N. & Kesselheim, A. S. False Negative Tests for SARS-CoV-2  
207            Infection — Challenges and Implications. *N. Engl. J. Med.* NEJMp2015897 (2020)  
208            doi:10.1056/NEJMp2015897.
- 209

210 **Table 1.** Parameter values. See Supplemental Table 1 for a summary of the meanings of the  $I_1$ ,  
 211  $I_2$ ,  $R_1$ , and  $R_2$  categories.  
 212

| Parameter                                                   | Point estimate | Lower bound | Upper bound | Source                  |
|-------------------------------------------------------------|----------------|-------------|-------------|-------------------------|
| Maximum simulation length (days)                            | 365            | —           | —           | Assumption <sup>a</sup> |
| Days between donations                                      | 4              | 1           | 10          | Assumption <sup>a</sup> |
| Incidence (daily probability of infection)                  | $10^{-4}$      | $10^{-5}$   | $10^{-3}$   | Assumption <sup>b</sup> |
| $I_1$ duration (days)                                       | 2              | 1           | 4           | 8,9,15,16               |
| $I_2$ duration (days)                                       | 5              | 3           | 10          | 8,9,15,16               |
| $R_1$ duration (days)                                       | 7              | 3           | 15          | 8,9,15–18               |
| Probability that an infected donor is symptomatic           | 0.35           | 0.20        | 0.50        | <sup>6</sup>            |
| Probability that an infected donor sheds virus in stool     | 0.5            | 0.33        | 0.66        | 7,10,15,16              |
| Days of donations rejected prior to development of symptoms | 14             | —           | —           | Assumption <sup>a</sup> |
| Days between serology tests                                 | 60             | —           | —           | Assumption <sup>a</sup> |
| Serology test sensitivity                                   | 0.95           | 0.8         | 0.99        | <sup>19</sup>           |
| Serology test specificity                                   | 0.95           | 0.8         | 0.99        | Assumption              |
| Days between swab tests                                     | 14             | —           | —           | Assumption <sup>a</sup> |
| Swab test sensitivity                                       | 0.75           | 0.5         | 0.95        | <sup>20</sup>           |
| Swab test specificity                                       | 0.99           | 0.95        | 1           | Assumption              |
| Stool test sensitivity                                      | 0.9            | 0.5         | 0.99        | Assumption <sup>c</sup> |
| Stool test specificity                                      | 0.99           | 0.95        | 1           | Assumption <sup>c</sup> |

213 a: Informed by operations at a large stool bank.  
 214 b: The point estimate of  $10^{-4}$  corresponds to 35,000 daily cases in a population of 350 million,  
 215 approximating the US average in early April 2020.  
 216 c: Informed by an assay being implemented at a large stool bank.  
 217

218 **Figure 1.** Number of virus-negative and -positive donations released (columns, x-axis) across  
219 simulations (y-axis) for different daily incidences (rows, infections per person per day) when  
220 using different testing strategies (colors). Swabs are always at 14-day intervals and serology is  
221 always at 60-day intervals. Stool tests are performed at 14-day intervals, 28-day intervals, or for  
222 every donation.  
223

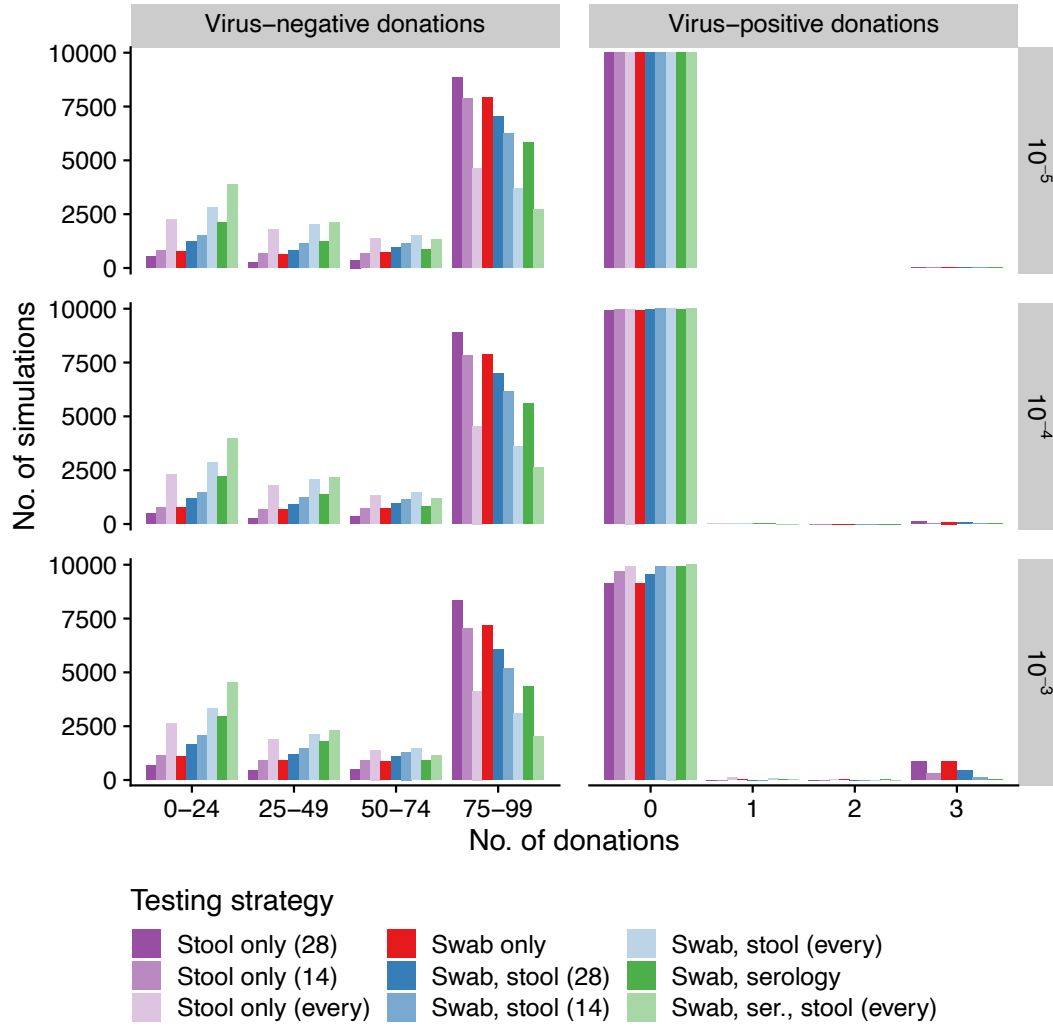

225 **Supplemental Table 1.** Summary of donor disease course phases and their relationship to  
 226 each test.  
 227

| Status                                 | Signs/<br>symptoms    | Nasopharyngeal<br>test | Stool<br>test       | Serology<br>test |
|----------------------------------------|-----------------------|------------------------|---------------------|------------------|
| Unexposed ( $U$ )                      | –                     | –                      | –                   | –                |
| Infected but not<br>shedding ( $I_1$ ) | + (if<br>symptomatic) | +                      | –                   | –                |
| Infected and<br>shedding ( $I_2$ )     | + (if<br>symptomatic) | +                      | + (if a<br>shedder) | –                |
| Recovered but<br>shedding ( $R_1$ )    | –                     | –                      | + (if a<br>shedder) | +                |
| Fully recovered<br>( $R_2$ )           | –                     | –                      | –                   | +                |

228  
 229  
 230  
 231  
 232  
 233  
 234

**Supplemental Table 2.** Virus-positive donations released over 10,000 simulations. Values  
 shown are the proportion of total released donations that are virus-positive, 95% confidence  
 interval on that proportion, and the raw counts of virus-positive donations / total released  
 donations. Proportions are shown to one significant digit.

| Testing strategy          | Daily incidence (infections per person per day) |                                        |                                           |
|---------------------------|-------------------------------------------------|----------------------------------------|-------------------------------------------|
|                           | $10^{-5}$                                       | $10^{-4}$                              | $10^{-3}$                                 |
| Stool only (28)           | 4 pcm (3 pcm to 5 pcm; 33/848185)               | 30 pcm (30 pcm to 40 pcm; 288/851793)  | 300 pcm (300 pcm to 300 pcm; 2636/819180) |
| Stool only (14)           | 2 pcm (1 pcm to 4 pcm; 18/793167)               | 10 pcm (8 pcm to 10 pcm; 77/793966)    | 100 pcm (100 pcm to 100 pcm; 901/743270)  |
| Stool only (every)        | 0 pcm (0 pcm to 0.6 pcm; 0/593511)              | 2 pcm (1 pcm to 4 pcm; 12/585989)      | 20 pcm (20 pcm to 20 pcm; 106/556362)     |
| Swab only                 | 3 pcm (2 pcm to 4 pcm; 21/799372)               | 40 pcm (30 pcm to 40 pcm; 284/794911)  | 300 pcm (300 pcm to 400 pcm; 2617/751393) |
| Swab, stool (28)          | 1 pcm (0.6 pcm to 2 pcm; 9/739826)              | 20 pcm (20 pcm to 20 pcm; 153/737824)  | 200 pcm (200 pcm to 200 pcm; 1394/677216) |
| Swab, stool (14)          | 0.9 pcm (0.3 pcm to 2 pcm; 6/693695)            | 4 pcm (2 pcm to 6 pcm; 26/690734)      | 50 pcm (40 pcm to 50 pcm; 306/623760)     |
| Swab, stool (every)       | 0 pcm (0 pcm to 0.7 pcm; 0/528625)              | 1 pcm (0.5 pcm to 3 pcm; 7/519153)     | 10 pcm (10 pcm to 20 pcm; 61/479578)      |
| Swab, serology            | 0.5 pcm (0.1 pcm to 1 pcm; 3/635133)            | 6 pcm (4 pcm to 9 pcm; 39/618887)      | 30 pcm (30 pcm to 40 pcm; 177/530406)     |
| Swab, ser., stool (every) | 0 pcm (0 pcm to 0.9 pcm; 0/430492)              | 0.2 pcm (0.006 pcm to 1 pcm; 1/418555) | 3 pcm (1 pcm to 5 pcm; 10/369524)         |

235 pcm = per cent mille = per 100,000  
 236

237 **Supplemental Figure. Sensitivity analysis.** Each point represents 1 simulation. Columns show  
238 testing strategies and outcomes (number of donations released). Rows show input parameters.

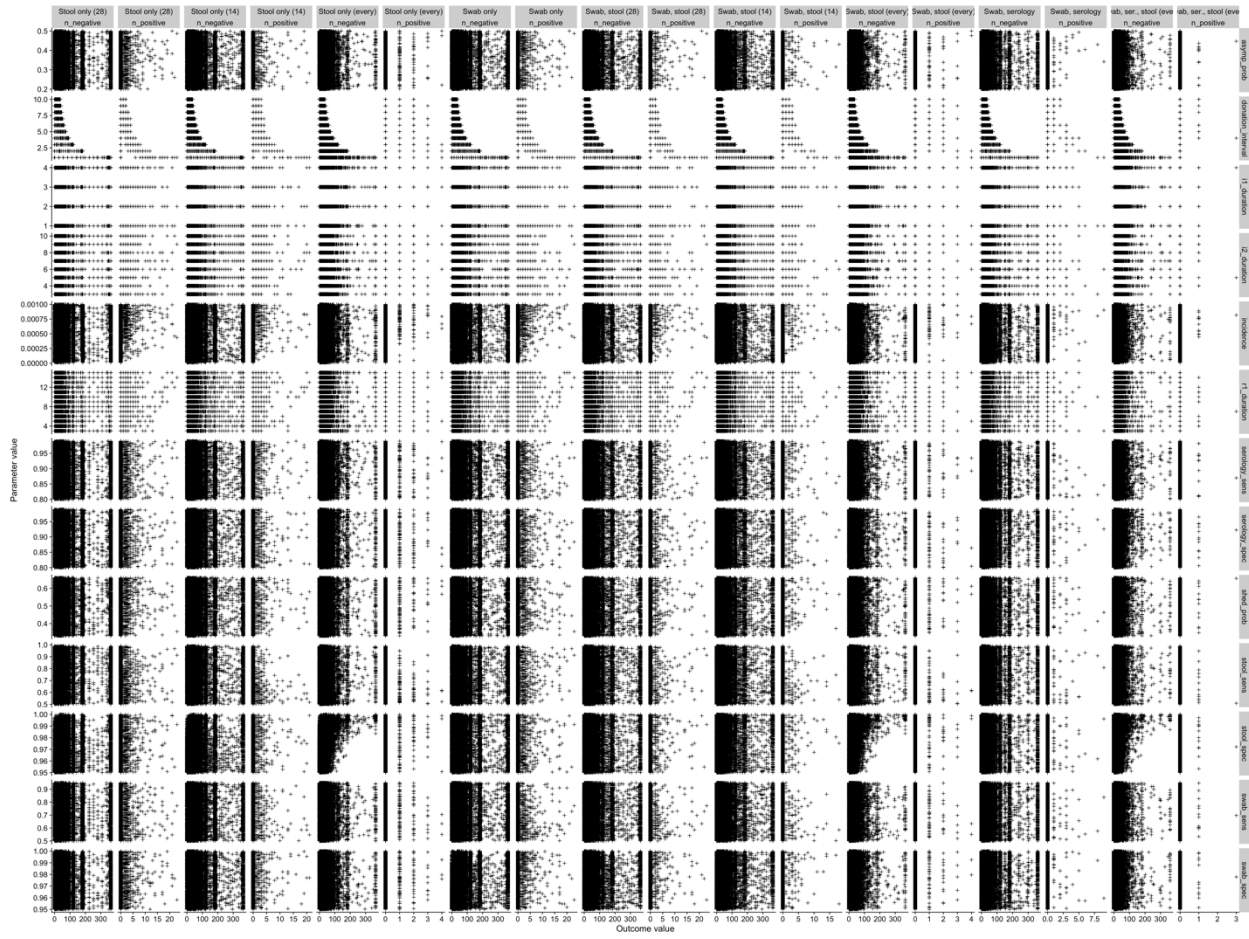

Source: https://biorxiv.org/content/10.1101/2020.06.24.169094v1.full.pdf
